# Supplementary material for: Disability in children: a global problem needing a well-coordinated global action
Source: PubMed Central journal article supplement — BMJ Paediatr Open. 2022 Feb 24;6(1):e001397. doi: 10.1136/bmjpo-2021-001397 (PMC8883278; doi:10.1136/bmjpo-2021-001397), 2022-02-24
Supplement: bmjpo-2021-001397.draft_revisions.pdf [file bmjpo-2021-001397.draft_revisions.pdf]

# BMJ Paediatrics Open

BMJ Paediatrics Open is committed to open peer review. As part of this commitment we make the peer review history of every article we publish publicly available.

When an article is published we post the peer reviewers' comments and the authors' responses online. We also post the versions of the paper that were used during peer review. These are the versions that the peer review comments apply to.

The versions of the paper that follow are the versions that were submitted during the peer review process. They are not the versions of record or the final published versions. They should not be cited or distributed as the published version of this manuscript.

BMJ Paediatrics Open is an open access journal and the full, final, typeset and author-corrected version of record of the manuscript is available on our site with no access controls, subscription charges or pay-per-view fees (<http://bmjpaedsopen.bmj.com>).

If you have any questions on BMJ Paediatrics Open's open peer review process please email [info.bmjpo@bmj.com](mailto:info.bmjpo@bmj.com)

# BMJ Paediatrics Open

## Disability in children: a global problem needing a well-coordinated global action.

|                               |                                                                                                                                                                                                                                                                                                                                                                                                                                                                                                                                         |
|-------------------------------|-----------------------------------------------------------------------------------------------------------------------------------------------------------------------------------------------------------------------------------------------------------------------------------------------------------------------------------------------------------------------------------------------------------------------------------------------------------------------------------------------------------------------------------------|
| Journal:                      | <i>BMJ Paediatrics Open</i>                                                                                                                                                                                                                                                                                                                                                                                                                                                                                                             |
| Manuscript ID                 | bmjpo-2021-001397                                                                                                                                                                                                                                                                                                                                                                                                                                                                                                                       |
| Article Type:                 | Editorial                                                                                                                                                                                                                                                                                                                                                                                                                                                                                                                               |
| Date Submitted by the Author: | 22-Dec-2021                                                                                                                                                                                                                                                                                                                                                                                                                                                                                                                             |
| Complete List of Authors:     | Olusanya, Bolajoko O.; Centre for Healthy Start Initiative<br>Halpern, Ricardo; Hospital da Criança Santo Antônio<br>Cheung, Vivian G.; University of Michigan Life Sciences Institute, Department of Pediatrics,<br>Nair, MKC; NIMS-Spectrum-Child Development Research Centre, NIMS Medicity Campus, Pediatrics<br>Boo, Nem; Universiti Tunku Abdul Rahman, Population Medicine<br>Hadders-Algra, Mijna; University of Groningen, University Medical Center Groningen , Department of Pediatrics, Division of Developmental Neurology |
| Keywords:                     | Rehabilitation                                                                                                                                                                                                                                                                                                                                                                                                                                                                                                                          |
|                               |                                                                                                                                                                                                                                                                                                                                                                                                                                                                                                                                         |

SCHOLARONE™  
Manuscripts

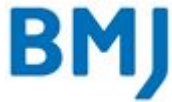

I, the Submitting Author has the right to grant and does grant on behalf of all authors of the Work (as defined in the below author licence), an exclusive licence and/or a non-exclusive licence for contributions from authors who are: i) UK Crown employees; ii) where BMJ has agreed a CC-BY licence shall apply, and/or iii) in accordance with the terms applicable for US Federal Government officers or employees acting as part of their official duties; on a worldwide, perpetual, irrevocable, royalty-free basis to BMJ Publishing Group Ltd ("BMJ") its licensees and where the relevant Journal is co-owned by BMJ to the co-owners of the Journal, to publish the Work in this journal and any other BMJ products and to exploit all rights, as set out in our [licence](#).

The Submitting Author accepts and understands that any supply made under these terms is made by BMJ to the Submitting Author unless you are acting as an employee on behalf of your employer or a postgraduate student of an affiliated institution which is paying any applicable article publishing charge ("APC") for Open Access articles. Where the Submitting Author wishes to make the Work available on an Open Access basis (and intends to pay the relevant APC), the terms of reuse of such Open Access shall be governed by a Creative Commons licence – details of these licences and which [Creative Commons](#) licence will apply to this Work are set out in our licence referred to above.

Other than as permitted in any relevant BMJ Author's Self Archiving Policies, I confirm this Work has not been accepted for publication elsewhere, is not being considered for publication elsewhere and does not duplicate material already published. I confirm all authors consent to publication of this Work and authorise the granting of this licence.

## EDITORIAL

**Disability in children: a global problem needing a well-coordinated global action.**

Bolajoko O. Olusanya,<sup>1</sup> Ricardo Halpern,<sup>2</sup> MKC Nair,<sup>3</sup> Nem Yun Boo,<sup>4</sup> Vivian G. Cheung,<sup>5</sup> Mijna Hadders-Algra<sup>6</sup>

**Affiliations**

<sup>1</sup>Centre for Healthy Start Initiative, 286A Corporation Drive, Dolphin Estate, Ikoyi, Lagos, Nigeria (B O Olusanya FRCPC). Email: [bolajoko.olusanya@uclmail.net](mailto:bolajoko.olusanya@uclmail.net)

Tel: +234 803 33 44 300. (Corresponding Author)

<sup>2</sup>Child Development Outpatient Clinic, Hospital da Criança Santo Antônio, Santa Casa de Porto Alegre, Porto Alegre, RS, Brazil (Prof R Halpern MD).

<sup>3</sup>NIMS-Spectrum-Child Development Research Centre, NIMS Medicity Campus, Aralummoodu, Thiruvananthapuram, Kerala, India (Prof M K C Nair DSc).

<sup>4</sup>Department of Population Medicine, Faculty of Medicine and Health Sciences, Universiti Tunku Abdul Rahman, Selangor, Malaysia (Prof N Y Boo FRCPC).

<sup>5</sup>Department of Pediatrics, Life Sciences Institute, University of Michigan, Ann Arbor, MI, USA (Prof V G Cheung MD).

<sup>6</sup>University of Groningen, University Medical Center Groningen, Department of Paediatrics, Division of Developmental Neurology, Groningen, the Netherlands (Prof M Hadders-Algra MD).

**Contributors:** BOO drafted the manuscript. RH, MKCN, NYB, VGC and MHA critically reviewed the draft and suggested essential edits. All authors contributed to revising the manuscript and have approved of the final version.

**Funding:** The authors have not declared a specific grant for this research from any funding agency in the public, commercial or not-for-profit sectors.

**Competing interests:** No conflicts of interest to declare. The authors are members of the Global Research on Developmental Disabilities Collaborators (GRDDC).

**Patient consent for publication:** Not required.

1  
2 In September 2015, 193 Member States of the United Nations unanimously signed a  
3  
4 social contract with their citizens to commit resources to realising a global agenda  
5  
6 consisting of 17 development goals under the Sustainable Development Goals (SDGs).<sup>1</sup>  
7  
8 Unlike the Millennium Development Goals (MDGs), the SDGs agenda makes explicit  
9  
10 provisions for disability-inclusiveness in policy interventions over the life course:  
11  
12 childhood, adolescence, adulthood, and old age. The UN agencies like the World Health  
13  
14 Organisation (WHO), United Nations Children's Fund (UNICEF), United Nations  
15  
16 Educational, Scientific and Cultural Organisation (UNESCO) and the World Bank  
17  
18 Group are usually tasked with providing global leadership in implementing the SDGs  
19  
20 within their core mandate.  
21  
22  
23  
24  
25  
26  
27

28 The specific focus on early childhood development (ECD) for children under-5 years as  
29  
30 one of the targets under the fourth SDG (SDG 4.2) is unprecedented and a clear  
31  
32 recognition of the importance of the early years from birth as the foundation of optimal  
33  
34 human capital development. SDG 4.2 is dedicated to the education sector, and it seeks  
35  
36 to ensure that all girls and boys have access to quality early childhood development,  
37  
38 care, and pre-primary education so that they are ready for primary education by 2030.  
39  
40 Ordinarily, matters relating to the well-being of children under-5 years are more  
41  
42 associated with the health sector because of the well-established global efforts to reduce  
43  
44 under-5 mortality and childhood malnutrition. However, the architects of this SDG  
45  
46 recognised the crucial and unique role of the health sector in preparing children from  
47  
48 birth through age 5 years for effective enrolment in primary education and specifically  
49  
50  
51  
52  
53  
54  
55  
56  
57  
58  
59  
60

1  
2 acknowledged the importance of health and psychosocial well-being in assessing child  
3  
4 development in early childhood.  
5  
6  
7

8  
9 Surprisingly, none of the targets and indicators for SDG 4, including ECD for children  
10 under-5 years are listed among the health-related SDGs by WHO or the global health  
11 community in general.<sup>2</sup> As a result, a lacuna emerged that has been exploited by various  
12 ECD champions to promote discordant narratives that do not align with the extensive  
13 scientific evidence on the crucial role of the health sector in facilitating early detection  
14 and intervention services (EDIS) for all children at risk of poor development in early  
15 childhood.<sup>3</sup> This action potentially impairs the chances of children under 5 years with  
16 disabilities for effective primary school enrolment as envisioned by SDGs. Moreover, the  
17 absence of an effective and universally accepted priority ECD framework for children  
18 under 5 years continues to undermine political support for appropriate policy and  
19 investment. For example, the flagship ECD programme by WHO, UNICEF and the  
20 World Bank Group, titled “Nurturing Care Framework” (NCF), was premised on an  
21 estimated 250 million children under-5 years in low- and middle-income countries  
22 (LMICs) who are suspected to be at risk of poor development or developmental delays  
23 due to stunting and poverty in 2015.<sup>4</sup> The recommended core interventions are home-  
24 based psychosocial stimulation and responsive caregiving among children younger than  
25 3 years. This ECD narrative was justified on the grounds that global estimates on  
26 children with disabilities, who are arguably at greater risk of poor development,  
27 especially in LMICs, were not available.<sup>5</sup>  
28  
29  
30  
31  
32  
33  
34  
35  
36  
37  
38  
39  
40  
41  
42  
43  
44  
45  
46  
47  
48  
49  
50  
51  
52  
53  
54  
55  
56  
57  
58  
59  
60

1  
2  
3  
4  
5  
6  
7  
8  
9  
10  
11  
12  
13  
14  
15  
16  
17  
18  
19  
20  
21  
22  
23  
24  
25  
26  
27  
28  
29  
30  
31  
32  
33  
34  
35  
36  
37  
38  
39  
40  
41  
42  
43  
44  
45  
46  
47  
48  
49  
50  
51  
52  
53  
54  
55  
56  
57  
58  
59  
60

Meanwhile, estimates from the Global Burden of Disease (GBD) database suggest that more than 53 million children under 5 years were at risk of poor development due to developmental disabilities.<sup>6</sup> In addition, the prior and widely cited estimate of 93 million children under 15 years with moderate-to-severe disabilities first reported in 2014 was updated in 2020 to at least 291 million children under 20 years and includes mild-to-severe disabilities.<sup>7</sup> In November 2021, UNICEF, for the first time published a special report in which almost 240 million children aged 2-17 years are estimated to be disabled based on parent-reported functional deficits.<sup>8</sup> The landmark report found that, compared to children without disabilities, children with disabilities are 34 percent more likely to be stunted, 25 percent more likely to be wasted, 24 percent less likely to receive early stimulation and responsive care, 25 percent less likely to attend early childhood education, 42 percent less likely to have foundational reading and numeracy skills, 49 percent more likely to have never attended school and 47 per cent more likely to be out of primary school. In addition, a comparison of global estimates of under-5 mortality and under-5 disability suggests that globally, newborns are ten times more likely to be disabled than to die before their fifth birthday.<sup>9</sup>

43  
44  
45  
46  
47  
48  
49  
50  
51  
52  
53  
54  
55  
56  
57  
58  
59  
60

Taken together, available evidence from different sources including the latest UNICEF report, clearly suggests the need for a complete overhaul of the NCF to reflect the required priority for ECD as envisaged under the SDGs. It is common knowledge that global governance for child health and wellbeing is fragmented and disjointed.<sup>10</sup> The UN agencies often give the appearance of collaboration both at international and local levels, especially in their publications and reports, but in reality, the agencies often

1  
2 work in isolation, thereby undermining the realisation of the commitments of UN  
3  
4 Member States to their citizens.<sup>11,12</sup> Mechanisms for accountability to the public are not  
5  
6 clearly defined. Internal rivalry and power-play among units and professionals within  
7  
8 these agencies is also not uncommon. This has resulted in the absence of an effective  
9  
10 global governance for ECD policies and programmes. The evidence-based priorities for  
11  
12 ECD are rarely embraced and matched with the core competences of the agencies. For  
13  
14 example, whereas UNICEF is officially designated as the sole custodian agency for  
15  
16 monitoring SDG 4.2.1 for ECD, the organisation would require a closer collaboration  
17  
18 with WHO, the World Bank Group and UNESCO in conceptualising an evidence-driven  
19  
20 priority agenda. The WHO has a stronger leverage in the health sector among UN  
21  
22 Member States than any other agencies and is more resourced to guide and deliver  
23  
24 health related EDIS from birth to age 5 years. Without such an understanding and  
25  
26 collaboration at the global level, the likelihood is that local officials in various  
27  
28 government ministries will simply focus on sectoral programmes foisted on them by  
29  
30 individual agencies without any consideration or sense of ownership for the outcomes  
31  
32 among the target beneficiaries.  
33  
34  
35  
36  
37  
38  
39  
40  
41  
42

43 LMICs have a lot to learn from time-tested approaches for children with disabilities in  
44  
45 high-income countries (HICs) where health-sector led ECD initiatives have proven to be  
46  
47 a vital component of effective inclusive education policy. Countries without effective  
48  
49 EDIS rooted in the health-sector are likely to have poor enrolment of children with  
50  
51 disabilities. These services are routinely offered in HICs but are yet to be considered a  
52  
53 priority in LMICs where the burden of disabilities in children under 5 years is  
54  
55  
56  
57  
58  
59  
60



1  
2 substantial. The different approaches to ECD between HICs and LMICs only exacerbate  
3  
4 the huge health, educational and social inequalities between both regions and violates  
5  
6 the spirit and letter of the SDGs that seek the well-being of all populations regardless  
7  
8 of race, location, and disability status.<sup>1</sup> It is important to emphasise that the scope of  
9  
10 services required by children with disabilities in early childhood is multisectoral and  
11  
12 extends beyond the health sector. However, the health sector provides the most reliable  
13  
14 gateway to accessing the requisite services.  
15  
16  
17  
18  
19  
20

21 The case for accelerating progress for children under 5 years with disabilities by 2030  
22  
23 has been extensively discussed elsewhere.<sup>9</sup> Without effective partnership among the UN  
24  
25 agencies and other key players in ECD it is doubtful that the SDG vision for children  
26  
27 under 5 years will be realised. The disabled persons organisations (DPOs) also need to  
28  
29 be fully equipped and engaged to challenge and support these agencies. So far this group  
30  
31 of children are hardly included by the DPOs in their activities at the global and country  
32  
33 levels. The synergistic benefits of this partnership for children with disabilities in  
34  
35 LMICs are invaluable. For example, inclusive education at school entry if appropriately  
36  
37 conceptualised can serve as a key performance indicator for EDIS. This would require  
38  
39 that EDIS policy and programmes are geared towards addressing the awful statistics  
40  
41 on the low enrolment and drop-out rates in mainstream education among children with  
42  
43 disabilities. This would entail concerted efforts to address the well-documented social,  
44  
45 cultural, and economic barriers for effective EDIS, especially in LMICs.<sup>8,13,14</sup> Thus,  
46  
47 UNESCO, as the lead agency for education globally can provide the requisite long-term  
48  
49 strategic vision for WHO-UNICEF-led ECD initiatives from birth till age 5 years.  
50  
51  
52  
53  
54  
55  
56  
57  
58  
59  
60

1  
2 Similarly, global investment in promoting inclusive education without complementary  
3  
4 investment in EDIS from birth is unlikely to yield optimal enrolment of children with  
5  
6 disabilities. This would require a special attention to ensuring that health-systems in  
7  
8 LMICs are functionally disability-inclusive as it is currently the case in high-income  
9  
10 countries. These recommendations are achievable and necessary to ensure an equitable  
11  
12 ECD priority for children with disabilities and their families, especially in LMICs.  
13  
14  
15  
16  
17  
18

### 19 **Abbreviations**

20  
21 DPO: Disabled Persons Organisation; ECD: Early childhood development; EDIS: Early  
22  
23 detection and intervention services; HIC: High income country; LMIC: Low- and middle-  
24  
25 income country; NCF: Nurturing Care Framework; SDG: Sustainable Development  
26  
27 Goal  
28  
29  
30  
31  
32  
33  
34  
35  
36  
37  
38  
39  
40  
41  
42  
43  
44  
45  
46  
47  
48  
49  
50  
51  
52  
53  
54  
55  
56  
57  
58  
59  
60

## References

1. United Nations. Sustainable Development Goals. UN, New York, NY, USA: 2015. Available from: <http://www.un.org/sustainabledevelopment/sustainable-development-goals> (accessed 20 December 2021).
2. Shawar YR, Shiffman J. Generation of global political priority for early childhood development: the challenges of framing and governance. *Lancet* 2017;389:119-24.
3. GBD 2017 SDG Collaborators. Measuring progress from 1990 to 2017 and projecting attainment to 2030 of the health-related Sustainable Development Goals for 195 countries and territories: a systematic analysis for the Global Burden of Disease Study 2017. *Lancet* 2018;392:2091-138.
4. United Nations Children's Fund (UNICEF), World Health Organisation (WHO), the World Bank Group. Nurturing care for early childhood development: a framework for helping children survive and thrive to transform health and human potential. Geneva: World Health Organisation, 2018. Available from: <http://apps.who.int/iris/bitstream/handle/10665/272603/9789241514064-eng.pdf?ua=1> (accessed 20 December 2021).
5. Grantham-McGregor S, Cheung YB, Cueto S, et al; International Child Development Steering Group. Developmental potential in the first 5 years for children in developing countries. *Lancet* 2007;369:60-70.
6. Global Research on Developmental Disabilities Collaborators (GRDDC). Developmental disabilities among children younger than 5 years in 195 countries and territories, 1990-2016: a systematic analysis for the Global Burden of Disease Study 2016. *Lancet Glob Health* 2018;6:e1100-21.
7. Olusanya BO, Wright SM, Nair MKC, et al; Global Research on Developmental Disabilities Collaborators (GRDDC). Global Burden of Childhood Epilepsy, Intellectual Disability, and Sensory Impairments. *Pediatrics* 2020;146:e20192623.
8. United Nations Children's Fund (UNICEF). Seen, Counted, Included: Using data to shed light on the well-being of children with disabilities, UNICEF, New York, 2021. Available from: <https://data.unicef.org/resources/children-with-disabilities-report-2021/> (accessed 20 December 2021)

- 1  
2  
3  
4  
5  
6  
7  
8  
9  
10  
11  
12  
13  
14  
15  
16  
17  
18  
19  
20  
21  
22  
23  
24  
25  
26  
27  
28  
29  
30  
31  
32  
33  
34  
35  
36  
37  
38  
39  
40  
41  
42  
43  
44  
45  
46  
47  
48  
49  
50  
51  
52  
53  
54  
55  
56  
57  
58  
59  
60
9. Global Research on Developmental Disabilities Collaborators (GRDDC). Accelerating progress for early child development for children under 5 years with developmental disabilities by 2030. *Lancet Global Health* (in press).
10. Clark H, Coll-Seck AM, Banerjee A, et al. A future for the world's children? A WHO-UNICEF-Lancet Commission. *Lancet*. 2020;395:605-58.
11. Spicer N, Agyepong I, Ottersen T, Jahn A, Ooms G. 'It's far too complicated': why fragmentation persists in global health. *Global Health* 2020;16(1):60.
12. Frenk J, Moon S. Governance challenges in Global Health. *New Engl J Med* 2013;368:936-42.
13. George CE, Norman G, Benjamin TE, Mukherjee D. Barriers to Early Diagnosis, Intervention and Social Integration of Children with Developmental Disabilities: A Qualitative Study from Rural Villages and a Poor Urban Settlement of Bangalore, South India. *Disability, CBR & Inclusive Development*. 2014;25:61-83. DOI: <http://doi.org/10.5463/dcid.v25i4.333> (accessed 20 December 2021)
14. Sapiets SJ, Totsika V, Hastings RP. Factors influencing access to early intervention for families of children with developmental disabilities: A narrative review. *J Appl Res Intellect Disabil* 2021;34:695-711.

# BMJ Paediatrics Open

## Disability in children: a global problem needing a well-coordinated global action.

|                               |                                                                                                                                                                                                                                                                                                                                                                                                                                                                                                                                      |
|-------------------------------|--------------------------------------------------------------------------------------------------------------------------------------------------------------------------------------------------------------------------------------------------------------------------------------------------------------------------------------------------------------------------------------------------------------------------------------------------------------------------------------------------------------------------------------|
| Journal:                      | <i>BMJ Paediatrics Open</i>                                                                                                                                                                                                                                                                                                                                                                                                                                                                                                          |
| Manuscript ID                 | bmjpo-2021-001397.R1                                                                                                                                                                                                                                                                                                                                                                                                                                                                                                                 |
| Article Type:                 | Editorial                                                                                                                                                                                                                                                                                                                                                                                                                                                                                                                            |
| Date Submitted by the Author: | 06-Feb-2022                                                                                                                                                                                                                                                                                                                                                                                                                                                                                                                          |
| Complete List of Authors:     | Olusanya, Bolajoko; Centre for Healthy Start Initiative<br>Halpern, Ricardo; Hospital da Criança Santo Antônio<br>Cheung, Vivian G.; University of Michigan Life Sciences Institute, Department of Pediatrics,<br>Nair, MKC; NIMS-Spectrum-Child Development Research Centre, NIMS Medicity Campus, Pediatrics<br>Boo, Nem; Universiti Tunku Abdul Rahman, Population Medicine<br>Hadders-Algra, Mijna; University of Groningen, University Medical Center Groningen , Department of Pediatrics, Division of Developmental Neurology |
| Keywords:                     | Rehabilitation                                                                                                                                                                                                                                                                                                                                                                                                                                                                                                                       |
|                               |                                                                                                                                                                                                                                                                                                                                                                                                                                                                                                                                      |

SCHOLARONE™  
Manuscripts



I, the Submitting Author has the right to grant and does grant on behalf of all authors of the Work (as defined in the below author licence), an exclusive licence and/or a non-exclusive licence for contributions from authors who are: i) UK Crown employees; ii) where BMJ has agreed a CC-BY licence shall apply, and/or iii) in accordance with the terms applicable for US Federal Government officers or employees acting as part of their official duties; on a worldwide, perpetual, irrevocable, royalty-free basis to BMJ Publishing Group Ltd ("BMJ") its licensees and where the relevant Journal is co-owned by BMJ to the co-owners of the Journal, to publish the Work in this journal and any other BMJ products and to exploit all rights, as set out in our [licence](#).

The Submitting Author accepts and understands that any supply made under these terms is made by BMJ to the Submitting Author unless you are acting as an employee on behalf of your employer or a postgraduate student of an affiliated institution which is paying any applicable article publishing charge ("APC") for Open Access articles. Where the Submitting Author wishes to make the Work available on an Open Access basis (and intends to pay the relevant APC), the terms of reuse of such Open Access shall be governed by a Creative Commons licence – details of these licences and which [Creative Commons](#) licence will apply to this Work are set out in our licence referred to above.

Other than as permitted in any relevant BMJ Author's Self Archiving Policies, I confirm this Work has not been accepted for publication elsewhere, is not being considered for publication elsewhere and does not duplicate material already published. I confirm all authors consent to publication of this Work and authorise the granting of this licence.

## EDITORIAL

**Disability in children: a global problem needing a well-coordinated global action.**

Bolajoko O. Olusanya,<sup>1</sup> Ricardo Halpern,<sup>2</sup> MKC Nair,<sup>3</sup> Nem Yun Boo,<sup>4</sup> Vivian G. Cheung,<sup>5</sup> Mijna Hadders-Algra<sup>6</sup>

**Affiliations**

<sup>1</sup>Centre for Healthy Start Initiative, 286A Corporation Drive, Dolphin Estate, Ikoyi, Lagos, Nigeria (B O Olusanya FRCPC). Email: [bolajoko.olusanya@uclmail.net](mailto:bolajoko.olusanya@uclmail.net)

Tel: +234 803 33 44 300. (**Corresponding Author**)

<sup>2</sup>Child Development Outpatient Clinic, Hospital da Criança Santo Antônio, Santa Casa de Porto Alegre, Porto Alegre, RS, Brazil (Prof R Halpern MD).

<sup>3</sup>NIMS-Spectrum-Child Development Research Centre, NIMS Medicity Campus, Aralummoodu, Thiruvananthapuram, Kerala, India (Prof M K C Nair DSc).

<sup>4</sup>Department of Population Medicine, Faculty of Medicine and Health Sciences, Universiti Tunku Abdul Rahman, Selangor, Malaysia (Prof N Y Boo FRCPC).

<sup>5</sup>Department of Pediatrics, Life Sciences Institute, University of Michigan, Ann Arbor, MI, USA (Prof V G Cheung MD).

<sup>6</sup>University of Groningen, University Medical Center Groningen, Department of Paediatrics, Division of Developmental Neurology, Groningen, the Netherlands (Prof M Hadders-Algra MD).

**Contributors:** BOO drafted the manuscript. RH, MKCN, NYB, VGC and MHA critically reviewed the draft and suggested essential edits. All authors contributed to revising the manuscript and have approved of the final version.

**Funding:** The authors have not declared a specific grant for this research from any funding agency in the public, commercial or not-for-profit sectors.

**Competing interests:** No conflicts of interest to declare. The authors are members of the Global Research on Developmental Disabilities Collaborators (GRDDC).

**Patient consent for publication:** Not required.

1  
2 In September 2015, 193 Member States of the United Nations (UN) unanimously signed  
3  
4 a social contract with their citizens to commit resources to realising a global agenda  
5  
6 consisting of 17 development goals under the Sustainable Development Goals (SDGs).<sup>1</sup>  
7  
8 Unlike the Millennium Development Goals (MDGs), the SDGs agenda makes explicit  
9  
10 provisions for disability-inclusiveness in policy interventions over the life course:  
11  
12 childhood, adolescence, adulthood, and old age. The UN agencies like the World Health  
13  
14 Organisation (WHO), United Nations Children's Fund (UNICEF), United Nations  
15  
16 Educational, Scientific and Cultural Organisation (UNESCO) and the World Bank  
17  
18 Group are usually tasked with providing global leadership in implementing the SDGs  
19  
20 within their core mandate.  
21  
22  
23  
24  
25  
26  
27

28 The specific focus on early childhood development (ECD) for children under-5 years as  
29  
30 one of the targets under the fourth SDG (SDG 4.2) is unprecedented and a clear  
31  
32 recognition of the importance of the early years from birth as the foundation of optimal  
33  
34 human capital development. SDG 4.2 is dedicated to the education sector, and it seeks  
35  
36 to ensure that all girls and boys have access to quality early childhood development,  
37  
38 care, and pre-primary education so that they are ready for primary education.  
39  
40 Ordinarily, matters relating to the well-being of children under-5 years are more  
41  
42 associated with the health sector because of the well-established global efforts to reduce  
43  
44 under-5 mortality and childhood malnutrition. However, the architects of this SDG  
45  
46 recognised the crucial and unique role of the health sector in preparing children from  
47  
48 birth through age 5 years for effective enrolment in primary education. The SDG  
49  
50  
51  
52  
53  
54  
55  
56  
57  
58  
59  
60



1  
2 specifically acknowledged the importance of health and psychosocial well-being in  
3  
4 assessing child development in early childhood.  
5  
6  
7  
8

9 Surprisingly, none of the targets and indicators for SDG 4, including ECD for children  
10 under-5 years, are listed among the health-related SDGs by WHO or the global health  
11 community in general.<sup>2</sup> As a result, a lacuna emerged that has been exploited by various  
12 ECD champions to promote discordant narratives that do not align with the extensive  
13 scientific evidence on the crucial role of the health sector in facilitating early detection  
14 and intervention services (EDIS) for all children at risk of poor development in early  
15 childhood.<sup>3</sup> This situation potentially impairs the opportunity for effective primary  
16 school enrolment among children under 5 years with disabilities as envisioned by SDGs.  
17 Moreover, the absence of an effective and universally accepted priority ECD framework  
18 for children under 5 years continues to undermine political support for appropriate  
19 policy and investment. For example, the flagship ECD programme by WHO, UNICEF  
20 and the World Bank Group, titled “Nurturing Care Framework” (NCF), was premised  
21 on an estimated 250 million children under-5 years in low- and middle-income countries  
22 (LMICs) who are suspected to be at risk of poor development or developmental delays  
23 due to stunting and poverty in 2015.<sup>4</sup> The recommended core interventions are home-  
24 based psychosocial stimulation and responsive caregiving among children younger than  
25 3 years which are helpful but largely insufficient in addressing the special needs of  
26 children with disabilities. This ECD narrative was justified on the grounds that global  
27 estimates on children with disabilities, who are arguably at greater risk of poor  
28  
29  
30  
31  
32  
33  
34  
35  
36  
37  
38  
39  
40  
41  
42  
43  
44  
45  
46  
47  
48  
49  
50  
51  
52  
53  
54  
55  
56  
57  
58  
59  
60

1  
2 development, especially in LMICs, were not available when the NCF was launched in  
3  
4 2018.<sup>5</sup>

6  
7 Meanwhile, estimates from the Global Burden of Disease (GBD) database published in  
8  
9 2018 suggested that more than 53 million children under 5 years were at risk of poor  
10  
11 development due to developmental disabilities.<sup>6</sup> In addition, the prior and widely cited  
12  
13 estimate of 93 million children under 15 years with moderate-to-severe disabilities first  
14  
15 reported in 2014 was updated in 2020 to at least 291 million children under 20 years  
16  
17 and includes mild-to-severe disabilities.<sup>7</sup> In November 2021, UNICEF, for the first time  
18  
19 published a special report in which almost 240 million children aged 2-17 years are  
20  
21 estimated to be disabled based on parent-reported functional deficits.<sup>8</sup> The landmark  
22  
23 report found that, compared to children without disabilities, children with disabilities  
24  
25 are 34 percent more likely to be stunted, 25 percent more likely to be wasted, 24 percent  
26  
27 less likely to receive early stimulation and responsive care, 25 percent less likely to  
28  
29 attend early childhood education, 42 percent less likely to have foundational reading  
30  
31 and numeracy skills, 49 percent more likely to have never attended school and 47 per  
32  
33 cent more likely to be out of primary school. In addition, a comparison of global  
34  
35 estimates of under-5 mortality and under-5 disability suggests that globally, newborns  
36  
37 are ten times more likely to be disabled than to die before their fifth birthday.<sup>9</sup>

38  
39  
40  
41  
42  
43  
44  
45  
46  
47 Taken together, available evidence from different sources including the latest UNICEF  
48  
49 report, clearly suggests the need for a complete overhaul of the NCF to reflect the  
50  
51 required priority for ECD as envisaged under the SDGs. It is common knowledge that  
52  
53 global governance for child health and wellbeing is fragmented and disjointed.<sup>10</sup> The  
54  
55  
56  
57  
58  
59  
60

1  
2 UN agencies often give the appearance of collaboration both at international and local  
3  
4 levels, especially in their publications and reports, but in reality, the agencies often  
5  
6 work in isolation, thereby undermining the realisation of the commitments of UN  
7  
8 Member States to their citizens.<sup>11,12</sup> Mechanisms for accountability to the public are not  
9  
10 clearly defined. Jurisdictional disputes and power-play among units and professionals  
11  
12 within these agencies is also not uncommon especially where roles and functions  
13  
14 overlap.<sup>3</sup> These have resulted in the absence of an effective global governance for ECD  
15  
16 policies and programmes. The evidence-based priorities for ECD are rarely embraced  
17  
18 and matched with the core competences of the agencies. For example, whereas UNICEF  
19  
20 is officially designated as the sole custodian agency for monitoring SDG 4.2.1 for ECD,  
21  
22 the organisation would require a closer collaboration with WHO, the World Bank Group  
23  
24 and UNESCO in conceptualising an evidence-driven priority agenda. The WHO has a  
25  
26 stronger leverage in the health sector among UN Member States than any other  
27  
28 agencies and is more resourced to guide and deliver health related EDIS from birth to  
29  
30 age 5 years. Without such an understanding and collaboration at the global level, the  
31  
32 likelihood is that local officials in various government ministries will simply focus on  
33  
34 sectoral programmes foisted on them by individual agencies without any consideration  
35  
36 or sense of ownership for the outcomes among the target beneficiaries.  
37  
38  
39  
40  
41  
42  
43  
44  
45  
46

47 LMICs have a lot to learn from time-tested approaches for children with disabilities in  
48  
49 high-income countries (HICs) where health-sector led ECD initiatives have proven to be  
50  
51 a vital component of effective inclusive education policy. Countries without effective  
52  
53 EDIS rooted in the health-sector are likely to have poor enrolment of children with  
54  
55  
56  
57  
58  
59  
60

1 disabilities. These services are routinely offered in HICs but are yet to be considered a  
2  
3 priority, in some contextually relevant form, in LMICs where the burden of disabilities  
4  
5 in children under 5 years is substantial. The different approaches to ECD between HICs  
6  
7 and LMICs only exacerbate the huge health, educational and social inequalities  
8  
9 between both regions and violates the spirit and letter of the SDGs that seek the well-  
10  
11 being of all populations regardless of race, location, and disability status.<sup>1</sup> It is  
12  
13 important to emphasise that the scope of services required by children with disabilities  
14  
15 in early childhood is multisectoral and extends beyond the health sector. However, the  
16  
17 health sector provides the most reliable gateway to accessing the requisite services.  
18  
19  
20  
21  
22  
23  
24  
25

26 The case for investing in children under 5 years with disabilities to ensure meaningful  
27  
28 progress by 2030 has been extensively discussed elsewhere.<sup>9</sup> Without effective  
29  
30 partnership among the UN agencies and other key players in ECD it is doubtful that  
31  
32 the SDG vision for children under 5 years will be realised. The disabled persons  
33  
34 organisations (DPOs) also need to be fully equipped and engaged to challenge and  
35  
36 support these agencies. So far this group of children are hardly included by the DPOs  
37  
38 in their activities at the global and country levels. The synergistic benefits of this  
39  
40 partnership for children with disabilities in LMICs are invaluable. For example, school  
41  
42 readiness for inclusive education if appropriately conceptualised can serve as a key  
43  
44 performance indicator for EDIS.<sup>13</sup> This would require that EDIS policy and programmes  
45  
46 are geared towards addressing the poor statistics on school enrolment and drop-out  
47  
48 rates in mainstream education among children with disabilities. This would entail  
49  
50 concerted efforts to address the well-documented social, cultural, and economic barriers  
51  
52  
53  
54  
55  
56  
57  
58  
59  
60

1  
2 for effective EDIS, especially in LMICs.<sup>8,14,15</sup> Thus, UNESCO, as the lead agency for  
3  
4 education globally can provide the requisite long-term strategic vision for WHO-  
5  
6 UNICEF-led ECD initiatives from birth till age 5 years as exemplified in some HICs.<sup>16</sup>  
7  
8 Similarly, global investment in promoting inclusive education without complementary  
9  
10 investment in EDIS for school readiness from birth is unlikely to yield optimal  
11  
12 enrolment of children with disabilities. The health-systems in LMICs will need to be  
13  
14 adapted and strengthened to be more functional and disability-friendly as it is currently  
15  
16 the case in high-income countries. These recommendations are achievable and  
17  
18 necessary to ensure an equitable ECD priority for children with disabilities and their  
19  
20 families, especially in LMICs by 2030.  
21  
22  
23  
24  
25  
26  
27

## 28 **Abbreviations**

29  
30  
31 DPO: Disabled Persons Organisation; ECD: Early childhood development; EDIS: Early  
32  
33 detection and intervention services; HIC: High income country; LMIC: Low- and middle-  
34  
35 income country; NCF: Nurturing Care Framework; SDG: Sustainable Development  
36  
37 Goal  
38  
39  
40  
41  
42  
43  
44  
45  
46  
47  
48  
49  
50  
51  
52  
53  
54  
55  
56  
57  
58  
59  
60

## References

1. United Nations. Sustainable Development Goals. UN, New York, NY, USA: 2015. Available from: <http://www.un.org/sustainabledevelopment/sustainable-development-goals> (accessed 5 February 2022).
2. GBD 2017 SDG Collaborators. Measuring progress from 1990 to 2017 and projecting attainment to 2030 of the health-related Sustainable Development Goals for 195 countries and territories: a systematic analysis for the Global Burden of Disease Study 2017. *Lancet* 2018;392:2091-138.
3. Shawar YR, Shiffman J. Generation of global political priority for early childhood development: the challenges of framing and governance. *Lancet* 2017;389:119-24.
4. United Nations Children's Fund (UNICEF), World Health Organisation (WHO), the World Bank Group. Nurturing care for early childhood development: a framework for helping children survive and thrive to transform health and human potential. Geneva: World Health Organisation, 2018. Available from: <http://apps.who.int/iris/bitstream/handle/10665/272603/9789241514064-eng.pdf?ua=1> (accessed 5 February 2022).
5. Grantham-McGregor S, Cheung YB, Cueto S, et al; International Child Development Steering Group. Developmental potential in the first 5 years for children in developing countries. *Lancet* 2007;369:60-70.
6. Global Research on Developmental Disabilities Collaborators (GRDDC). Developmental disabilities among children younger than 5 years in 195 countries and territories, 1990-2016: a systematic analysis for the Global Burden of Disease Study 2016. *Lancet Glob Health* 2018;6:e1100-21.
7. Olusanya BO, Wright SM, Nair MKC, et al; Global Research on Developmental Disabilities Collaborators (GRDDC). Global Burden of Childhood Epilepsy, Intellectual Disability, and Sensory Impairments. *Pediatrics* 2020;146:e20192623.
8. United Nations Children's Fund (UNICEF). Seen, Counted, Included: Using data to shed light on the well-being of children with disabilities, UNICEF, New York, 2021. Available from: <https://data.unicef.org/resources/children-with-disabilities-report-2021/> (accessed 5 February 2022)

- 1  
2  
3  
4  
5  
6  
7  
8  
9  
10  
11  
12  
13  
14  
15  
16  
17  
18  
19  
20  
21  
22  
23  
24  
25  
26  
27  
28  
29  
30  
31  
32  
33  
34  
35  
36  
37  
38  
39  
40  
41  
42  
43  
44  
45  
46  
47  
48  
49  
50  
51  
52  
53  
54  
55  
56  
57  
58  
59  
60
9. Global Research on Developmental Disabilities Collaborators (GRDDC). Accelerating progress for early child development for children under 5 years with developmental disabilities by 2030. *Lancet Glob Health Published Online January 14, 2022*. [https://doi.org/10.1016/S2214-109X\(21\)00488-5](https://doi.org/10.1016/S2214-109X(21)00488-5).
10. Clark H, Coll-Seck AM, Banerjee A, et al. A future for the world's children? A WHO-UNICEF-Lancet Commission. *Lancet*. 2020;395:605-58.
11. Spicer N, Agyepong I, Ottersen T, Jahn A, Ooms G. 'It's far too complicated': why fragmentation persists in global health. *Global Health* 2020;16(1):60.
12. Frenk J, Moon S. Governance challenges in Global Health. *New Engl J Med* 2013;368:936-42.
13. Peterson JW, Loeb S, Chamberlain LJ. The Intersection of Health and Education to Address School Readiness of All Children. *Pediatrics*. 2018;142:e20181126.
14. George CE, Norman G, Benjamin TE, Mukherjee D. Barriers to Early Diagnosis, Intervention and Social Integration of Children with Developmental Disabilities: A Qualitative Study from Rural Villages and a Poor Urban Settlement of Bangalore, South India. *Disability, CBR & Inclusive Development*. 2014;25:61-83. <http://doi.org/10.5463/dcid.v25i4.333> (accessed 5 February 2022)
15. Sapiets SJ, Totsika V, Hastings RP. Factors influencing access to early intervention for families of children with developmental disabilities: A narrative review. *J Appl Res Intellect Disabil* 2021;34:695-711.
16. U.S. Department of Education. 41st Annual report to Congress on the implementation of the Individuals with Disabilities Education Act, parts B and C: 2019. <https://sites.ed.gov/idea/files/41st-arc-for-idea.pdf> (accessed 5 February 2022).
